# Supplementary material for: Simultaneous inhibition of JAK and SYK kinases ameliorates chronic and destructive arthritis in mice
Source: Springer Nature journal article supplement (doi:10.1186/s13075-015-0866-0), 2015-12-01

Figure Additional 1.

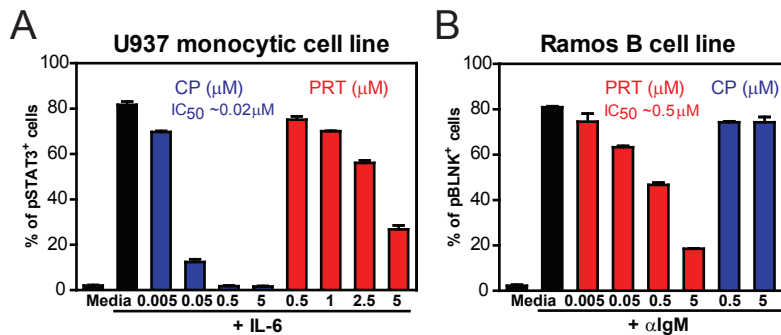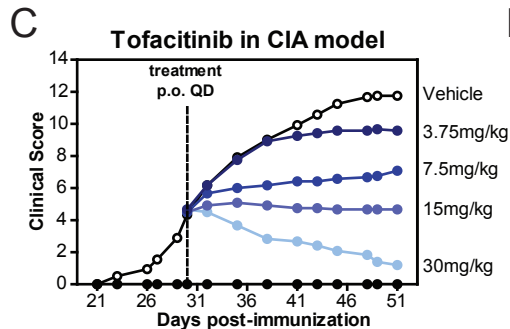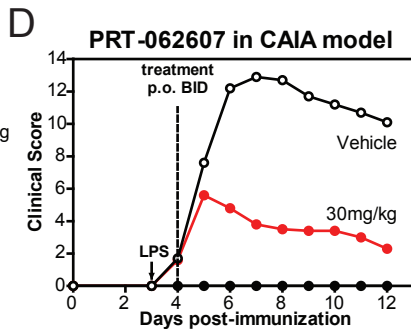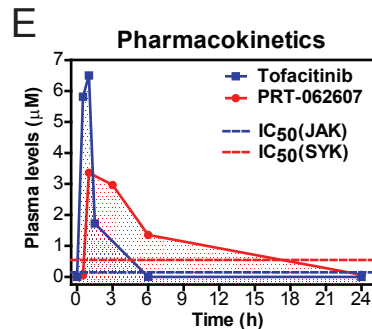

Supplement: MOESM1 [file 9784168]
